# Supplementary material for: Chinese olive extract ameliorates hepatic lipid accumulation in vitro and in vivo by regulating lipid metabolism
Source: PubMed Central journal article supplement (PMC5773498; doi:10.1038/s41598-018-19553-1), 2018-01-18
Supplement: 41598_2018_19553_MOESM1_ESM.pdf [file 41598_2018_19553_MOESM1_ESM.pdf]

## Supplementary Information

### **Chinese olive extract ameliorates hepatic lipid accumulation**

#### ***in vitro* and *in vivo* by regulating lipid metabolism**

Yu-Te Yeh<sup>1</sup>, Yan-Yu Cho<sup>2</sup>, Shu-Chen Hsieh<sup>1,\*</sup>, An-Na Chiang<sup>2,\*</sup>

<sup>1</sup>Institute of Food Science and Technology, National Taiwan University, Taipei, Taiwan.

<sup>2</sup>Institute of Biochemistry and Molecular Biology, National Yang-Ming University, Taipei, Taiwan.

**Table S1.** Primer sequences used for qRT-PCR analysis

| <b>Gene</b>   | <b>Forward primer</b>    | <b>Reverse primer</b>    |
|---------------|--------------------------|--------------------------|
| CD36          | GCTTGCAACTGTCAGCACAT     | GCCTTGCTGTAGCCAAGAAC     |
| FAS           | CTGAGATCCCAGCACTTCTTGA   | GCCTCCGAAGCCAAATGAGTGA   |
| SREBP-1c      | AGGTGTATTTGCTGGCTTGGT    | AGAGATGACTAGGGAAGTGTGTGT |
| ACC1          | GGCTGGGCTTGTATAAGT       | GATAATATGGCAATCTCAGT     |
| PPAR $\alpha$ | CCTGCTTCCTGCCACTTG       | G TTCACCCTGATTCCTGA      |
| CPT-1         | ACATCCCTAAGCAGTGCCAG     | TCGTCCGGCACTTCTTGATC     |
| FABP          | CTGTGGAAAGGAAGCCTCGTT    | CTCAAAGTTCTCCTGGCTCTGC   |
| ACOX          | ACCAACTGTCACACTAACATATCA | GGCATGTAACCCGTAGCACT     |
| ATGL          | CTTGAGCAGCTAGAACAATG     | GGACACCTCAATAATGTTGGC    |
| HSL           | GCTGGAGGAGTGTTTTTTTGC    | AGTTGAACCAAGCAGGTCACA    |
| MGL           | TCGGAACAAGTCGGAGGT       | TCAGCAGCTGTATGCCAAAG     |
| r18S          | TATCCCATGACCCGCC         | GTGAGGTTTCCCGTGTT        |

A

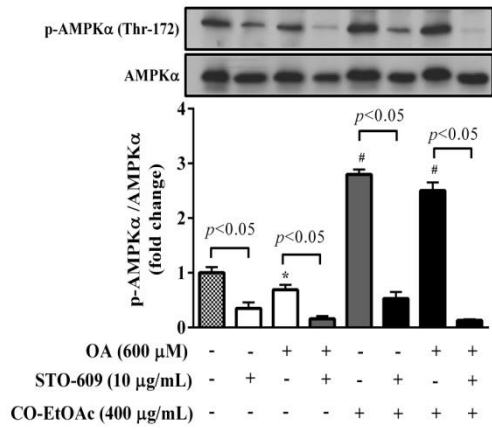

B

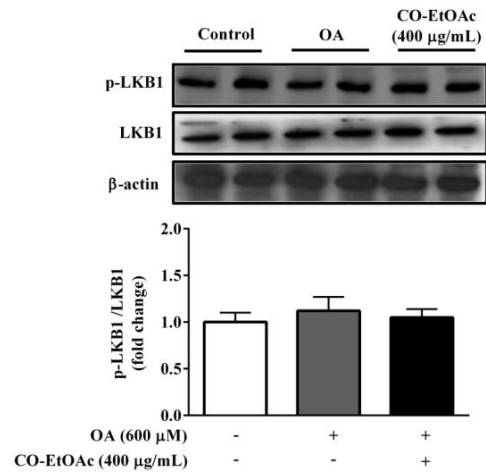

C

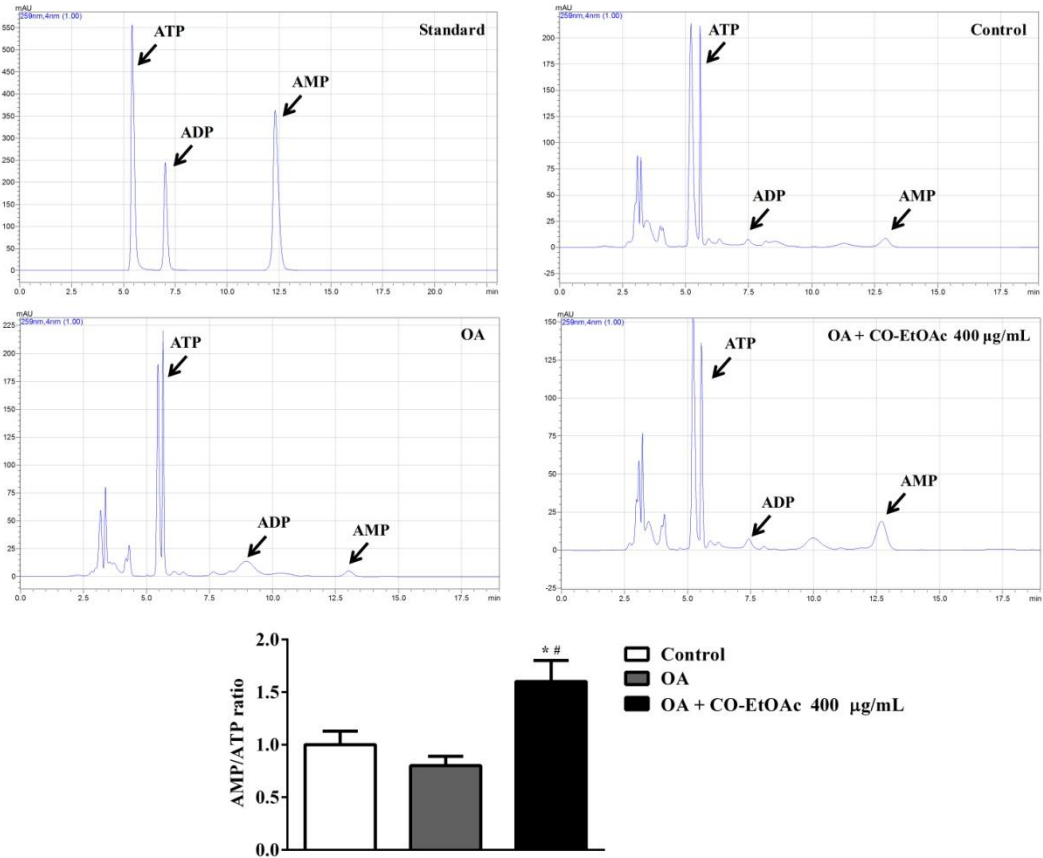

Figure S1. The involvement of CaMKK $\beta$ , LKB1, and AMP/ATP ratio in CO-EtOAc-induced AMPK activation. Cells were treatment with 600  $\mu$ M OA for 3 h and then treated with 400  $\mu$ g/mL of CO-EtOAc for another 21 h after pre-incubation. The levels of protein expression of (A) phosphorylated/total AMPK $\alpha$  in the presence or absence of 10  $\mu$ g/mL STO-609 (a CaMKK $\beta$  inhibitor) for 1 h before CO-EtOAc treatment and (B) phosphorylated/total LKB1 were measured by western blot analysis. (C) Intracellular ATP, ADP, and AMP contents were analyzed using HPLC. The position of ATP, ADP and AMP are indicated by arrows. The histogram shows the ratios of AMP:ATP for each group. All results are expressed as the mean  $\pm$  SEM of three independent experiments. \* $p$  < 0.05 versus the DMSO control group; #  $p$  < 0.05 versus the OA group.
